# Supplementary material
Source: PubMed Central journal article supplement (PMC7640642)
Supplement: 12916_2020_1825_MOESM1_ESM.pdf [file 12916_2020_1825_MOESM1_ESM.pdf]

**Table S1. Comparison of maternal characteristics between participants in this study and all pregnant cases reported in NERS**

| Maternal characteristics/outcomes  | Participants in this study<br>(n=72) | All pregnant cases in the national<br>epidemic reporting system<br>(n=138) | P value <sup>Δ</sup> |
|------------------------------------|--------------------------------------|----------------------------------------------------------------------------|----------------------|
| Age (years, mean (SD))             | 31 (28, 34)                          | 31 (27, 34)                                                                | 0.734                |
| Region                             |                                      |                                                                            |                      |
| <i>Wuhan</i>                       | 61 (84.7%)                           | 84 (61.3%)                                                                 | <b>&lt;0.001</b>     |
| <i>Other areas</i>                 | 11 (15.3%)                           | 54 (38.7%)                                                                 |                      |
| Infection period                   |                                      |                                                                            |                      |
| <i>1<sup>st</sup> trimester</i>    | 22 (30.6%)                           | 28 (20.3)                                                                  | <b>0.014</b>         |
| <i>2<sup>nd</sup> trimester</i>    | 6 (8.3%)                             | 31 (22.5)                                                                  |                      |
| <i>3<sup>rd</sup> trimester</i>    | 53 (73.6%)                           | 79 (57.2)                                                                  |                      |
| Condition                          |                                      |                                                                            |                      |
| <i>Mild case</i>                   | 63 (87.5%)                           | 121 (87.7%)                                                                | 0.970                |
| <i>Severe case</i>                 | 9 (12.5%)                            | 17 (12.3%)                                                                 |                      |
| Maternal complication              |                                      |                                                                            |                      |
| <i>No</i>                          | 59 (81.9%)                           | 130 (94.2%)                                                                | <b>0.005</b>         |
| <i>Yes</i>                         | 13 (18.1%)                           | 8 (5.8%)                                                                   |                      |
| Outcome                            |                                      |                                                                            |                      |
| <i>Cure</i>                        | 72 (100.0%)                          | 137 (99.3%)                                                                | 1.000                |
| <i>Death</i>                       | 0 (0.0%)                             | 1 (0.7%)                                                                   |                      |
| Hospital stay (days, median (IQR)) | 15 (9, 23)                           | 14 (9, 21)                                                                 | 0.626                |

<sup>Δ</sup> **The BLOD Font** in the column of *P value* indicates the significant difference (P<0.05) between two groups.

**Table S2. Maternal characteristics and outcomes of pregnant women confirmed with Covid-19 in three trimesters**

| <b>Maternal characteristics/outcomes</b> | <b>Total<br/>(n=72)</b> | <b>1<sup>st</sup> trimester<br/>(n=13)</b> | <b>2<sup>nd</sup> trimester<br/>(n=6)</b> | <b>3<sup>rd</sup> trimester<br/>(n=53)</b> | <b>P value<sup>Δ</sup></b> |
|------------------------------------------|-------------------------|--------------------------------------------|-------------------------------------------|--------------------------------------------|----------------------------|
| Covid-19 condition                       |                         |                                            |                                           |                                            |                            |
| <i>Mild case</i>                         | 63 (87.5%)              | 12 (92.3%)                                 | 6 (100.0%)                                | 45 (84.9%)                                 | 0.717                      |
| <i>Severe case</i>                       | 9 (12.5%)               | 1 (7.7%)                                   | 0 (0.0%)                                  | 8 (15.1%)                                  |                            |
| Maternal complication                    |                         |                                            |                                           |                                            |                            |
| <i>No</i>                                | 59 (81.9%)              | 13 (100.0%)                                | 5 (83.3%)                                 | 41 (77.4%)                                 | 0.167                      |
| <i>Yes</i>                               | 13 (18.1%)              | 0 (0.0%)                                   | 1 (16.7%)                                 | 12 (22.6%)                                 |                            |
| Hospital stay (days, median (IQR))       | 15 (9, 23)              | 14 (7, 16.5)                               | 15.5 (12, 27.5)                           | 16.5 (9, 23)                               | 0.570                      |
| Pregnancy outcome                        |                         |                                            |                                           |                                            |                            |
| <i>Delivery</i>                          | 57 (79.2%)              | 0 (0.0%)                                   | 4 (66.7%)                                 | 53 (100.0%)                                | <b>&lt;0.001</b>           |
| <i>Abortion</i>                          | 15 (20.8%)              | 13 (100.0%)                                | 2 (33.3%)                                 | 0 (0.0%)                                   |                            |
| Preterm                                  |                         |                                            |                                           |                                            |                            |
| <i>No</i>                                | 49/57 (86.0%)           | —                                          | 4/4 (100.0%)                              | 45/53 (84.9%)                              | 0.627                      |
| <i>Yes</i>                               | 8/57 (14.0%)            | —                                          | 0/4 (0.0%)                                | 8/53 (15.1%)                               |                            |

<sup>Δ</sup> **The BLOD Font** in the column of *P value* indicates the significant difference (P<0.05) among three groups.

**Table S3. Infants' neurobehavioral development at three months after delivery/abortion**

| <b>Infants' characteristics</b> | <b>Total<br/>(n=57)</b> | <b>Boy<br/>(n=28)</b> | <b>Girl<br/>(n=29)</b> | <b>P value<sup>Δ</sup></b> |
|---------------------------------|-------------------------|-----------------------|------------------------|----------------------------|
| Communication                   |                         |                       |                        |                            |
| <i>Normal</i>                   | 42 (80.8%)              | 19 (76.0%)            | 23 (85.2%)             | 0.492                      |
| <i>Monitoring</i>               | 10 (19.2%)              | 6 (24.0%)             | 4 (14.8%)              |                            |
| <i>Risk</i>                     | 0 (0.0%)                | 0 (0.0%)              | 0 (0.0%)               |                            |
| Gross motor                     |                         |                       |                        |                            |
| <i>Normal</i>                   | 45 (86.5%)              | 20 (80.0%)            | 25 (92.6%)             | 0.241                      |
| <i>Monitoring</i>               | 7 (13.5%)               | 5 (20.0%)             | 2 (7.4%)               |                            |
| <i>Risk</i>                     | 0 (0.0%)                | 0 (0.0%)              | 0 (0.0%)               |                            |
| Fine motor                      |                         |                       |                        |                            |
| <i>Normal</i>                   | 40 (76.9%)              | 19 (76.0%)            | 21 (77.8%)             | 0.891                      |
| <i>Monitoring</i>               | 9 (17.3%)               | 4 (16.0%)             | 5 (18.5%)              |                            |
| <i>Risk</i>                     | 3 (5.8%)                | 2 (8.0%)              | 1 (3.7%)               |                            |
| Problem solving                 |                         |                       |                        |                            |
| <i>Normal</i>                   | 42 (80.8%)              | 20 (80.0%)            | 22 (81.5%)             | 0.882                      |
| <i>Monitoring</i>               | 7 (13.5%)               | 4 (16.0%)             | 3 (11.1%)              |                            |
| <i>Risk</i>                     | 3 (5.8%)                | 1 (4.0%)              | 2 (7.4%)               |                            |
| Personal-social                 |                         |                       |                        |                            |
| <i>Normal</i>                   | 40 (76.9%)              | 20 (80.0%)            | 20 (74.1%)             | 0.455                      |
| <i>Monitoring</i>               | 7 (13.5%)               | 4 (16.0%)             | 3 (11.1%)              |                            |
| <i>Risk</i>                     | 5 (9.6%)                | 1 (4.0%)              | 4 (14.8%)              |                            |
| Social-emotional                |                         |                       |                        |                            |
| <i>Normal</i>                   | 6 (13.6%)               | 1 (5.3%)              | 5 (20.0%)              | 0.103                      |
| <i>Monitoring</i>               | 10 (22.7%)              | 7 (36.8%)             | 3 (12.0%)              |                            |
| <i>Risk</i>                     | 28 (63.6%)              | 11 (57.9%)            | 17 (68.0%)             |                            |

Percentages may not add to 100 because rounding.

\* Among the total of 57 cases, there were five cases (three boys and two girls) not responding to the questions on ASQ-3; and there were thirteen cases (nine boys and four girls) not responding to the questions on ASQ:SE-2.

<sup>Δ</sup> **The BLOD Font** in the column of *P value* indicates the significant difference ( $P < 0.05$ ) among three groups.

Table S4. Spearman's rank correlation coefficients of mother-baby separation, mothers' mental disorders and infants' neurobehavioral development

|                                  | 1             | 2            | 3      | 4            | 5             | 6            | 7            | 8      | 9 |
|----------------------------------|---------------|--------------|--------|--------------|---------------|--------------|--------------|--------|---|
| 1. Mother-baby separation (days) | 1             |              |        |              |               |              |              |        |   |
| 2. PTSD (scores)                 | 0.083         | 1            |        |              |               |              |              |        |   |
| 3. EPDS (scores)                 | 0.121         | <b>0.796</b> | 1      |              |               |              |              |        |   |
| 4. Communication (scores)        | -0.261        | -0.126       | -0.248 | 1            |               |              |              |        |   |
| 5. Gross motor (scores)          | <b>-0.287</b> | -0.057       | -0.250 | <b>0.536</b> | 1             |              |              |        |   |
| 6. Fine motor (scores)           | -0.146        | 0.026        | 0.032  | <b>0.572</b> | <b>0.598</b>  | 1            |              |        |   |
| 7. Problem solving (scores)      | <b>-0.288</b> | -0.152       | -0.164 | <b>0.619</b> | <b>0.687</b>  | <b>0.697</b> | 1            |        |   |
| 8. Personal-social (scores)      | <b>-0.288</b> | 0.032        | -0.077 | <b>0.523</b> | <b>0.648</b>  | <b>0.634</b> | <b>0.655</b> | 1      |   |
| 9. Social-emotional (scores)     | <b>-0.331</b> | 0.055        | 0.071  | -0.142       | <b>-0.316</b> | -0.293       | -0.241       | -0.042 | 1 |

<sup>Δ</sup> The **BLOD Font** indicates P<0.05.
